1           Who takes care of the kids at when? Variation of sex-role patterns  
2                           across different parental care forms in passerine birds

3  
4  
5

Daiping Wang<sup>1\*</sup> and Xiang-Yi Li Richter<sup>2\*</sup>

6       <sup>1</sup> Key Laboratory of Animal Ecology and Conservation Biology, Institute of Zoology, Chinese Academy of  
7       Sciences, 1 Beichen West Road, Chaoyang, 100101 Beijing, China

8       <sup>2</sup> Institute of Biology, University of Neuchâtel, Rue Emile-Argand 11, CH-2000 Neuchâtel, Switzerland

9       \*correspondence author, email: wangdaiping@ioz.ac.cn; email: li@evolbio.mpg.de

10

11       **Keywords:** parental care, nest building, nest incubation, offspring provisioning, sex roles, sexual selection,  
12       certainty of paternity, passerine birds

13

14       **Figures & Tables:** 2 figures, 1 table

15

16       **Supplementary materials:** 1 table

17

18       **Abstract (< 200 words):**

19       Parental care in birds usually consists of many elaborate forms, including nest building, incubation,  
20       provisioning the offspring and protecting them. Given the various life history differences between sexes,  
21       parents may have different opportunity costs of providing care in a specific form. But we still do not know  
22       whether males and females generally differ in their involvement in different care forms across stages of a  
23       breeding cycle, such as nest building, incubation and chick provisioning. Here, we performed a survey of  
24       parental care regarding which sex provides care in 882 species of passerine birds and found significant  
25       differences in the frequency distributions of sex-role patterns (i.e. female-only care, biparental care, and  
26       male-only care) across three distinct forms of parental care. This result showed clearly that parental care  
27       should not be treated as a unitary trait, but a composite of integrated features with diverse functions. Using  
28       a set of linear mixed-effect models we tested the effects of sexual selection, certainty of paternity,  
29       predation risk, and offspring's life history traits in driving the variation in sex roles. In general, we found  
30       species with female-only care tended to be under strong sexual selection on males, and uncertainty of  
31       paternity could reduce male care.

32

## 33 Introduction

34 Birds often provide extensive parental care that enhances the survival and future reproductive fitness of  
35 their offspring. Avian parental care comprises diverse forms, including nest building, incubation,  
36 provisioning the offspring and defending them against predators [1–3]. Despite the benefits that parental  
37 care brings, it costs energy, time, the opportunity for extra-pair mating and/or starting a new clutch, and  
38 may increase the predation risk for the parents. Consequently, there are conflicts between parents and  
39 offspring, and between male and female parents. In species of cooperative breeding, the conflicts also  
40 involve helpers of different degrees of relatedness with the breeders and the dependent offspring. These  
41 intricate relationships have inspired theoretical studies about the optimal parental care strategies. Early  
42 models characterised parental care as an all-or-none choice between deserting and caring [4–7], while later  
43 models generally treated parental investment as a continuous trait. The optimal levels of parental efforts  
44 have been studied as functions of various factors, including brood quality [8,9], certainty of paternity [10–  
45 12], operational sex ratio and sexual selection [13,14], and sex-specific life history characters such as adult  
46 mortality [15] and the ability to care [16]. Special attention has been paid to how the male and female  
47 parent negotiate to determine which sex should provide care, and in the case of biparental care, the amount  
48 of effort each of them contributes [17–20]. Most theoretical work, however, treat parental care as a unitary  
49 trait rather than a composite of several functionally integrated characteristics. A few rare exceptions have  
50 considered task specialisation between parents, such as feeding the young and defending them from  
51 predators [21,22], but these models do not make predictions on how parents contribute in different tasks  
52 over time across a breeding cycle.

53  
54 Do sex-specific parental strategies differ across distinct care forms? In other words, if one sex has  
55 participated in nest building, should it also incubate the eggs laid in that nest and/or feed the chicks after  
56 they hatch? Empirical studies provided some tentative hints that sex-specific opportunity costs of  
57 providing care can differ between different stages. In black coucals (*Centropus grillii*), a species of  
58 uniparental care by males only, incubating males were 17% less likely to sire extra-pair offspring than  
59 males that were not currently parenting, while males feeding nestlings were 48% less likely to sire extra-  
60 pair offspring than non-parenting males [23]. The varying degrees of disadvantage experienced by  
61 parenting males in siring extra-pair offspring showed that the opportunity costs of parenting can differ  
62 between different forms of care at different stages for males. In the cooperatively breeding chestnut-  
63 crowned babblers (*Pomatostomus ruficeps*), as brood aged, breeding females contributed less food than  
64 male breeders and helpers, and were the only carer to load-lighten by reducing their provisioning rates in  
65 the presence of additional carers [24]. The adjustment of provisioning rates by breeder females suggested  
66 the conservation of resources for future reproduction has been an opportunity cost of caring for the current  
67 brood, which increased in later stages of a reproductive cycle for females [24]. Therefore, we hypothesized  
68 that the involvement of males and females in different care forms may differ across different stages of  
69 parental care.

70

71 If our expectation was correct, the next step would be to uncover possible driving forces of the variation of  
72 sex roles across different care forms. In particular, we considered factors including sexual selection,  
73 certainty of parentage, predation risk, and offspring's life history traits such as clutch size and the duration  
74 of nestling development. Sexual selection was an important factor to consider because it was predicted to  
75 produce female-biased care in theory models [13,14], and was shown to be associated with evolutionary  
76 transitions between major patterns of parental care [25,26]. Sexual selection was also found to correlate  
77 negatively with the extent of parental cooperation [27]. Certainty of parentage was also an interesting  
78 factor to consider because theory and intuition generally suggested that males should invest more in the  
79 care of their genetic offspring especially when parental care is costly [10–12], but empirical support has  
80 been mixed, with frequent exceptions where males do not seem to react to paternity loss by reducing care  
81 or biasing their paternal efforts towards own genetic offspring [28–31]. We were also interested in testing  
82 the effect of predation risk because female passerine birds usually have more cryptic plumages than males  
83 [32], and therefore they might be more effective in providing care especially under high nest predation risk.  
84 The life history traits of offspring are of interest to study because they reflect broods' reproductive value  
85 and needs. Because parents' caring efforts are linked to the trade-off between their current and future  
86 reproductive fitness, they are expected to invest more in broods of higher reproductive value [8,9,33–35].  
87 And since larger broods and offspring with longer developmental time generally need more care, we are  
88 interested in testing whether higher needs of parental care were achieved by the participation of more  
89 carers (i.e. biparental care relative to uniparental care, with helpers relative to without helpers).

90

91 To find out whether sex roles in parental care differ between distinct care forms across different stages of  
92 reproduction, we performed a survey of the participation of males and females in three care forms (i.e. nest  
93 building, incubation, and offspring provisioning) across 882 species of passerine birds. As expected, we  
94 found marked differences in the frequency distributions of parental care patterns (i.e. female-only care,  
95 biparental care, and male-only care) across three care forms. To further investigate possible causes of the  
96 above finding, we built five linear mixed-effect models to test the roles of sexual selection, certainty of  
97 paternity, nest daily predation risk, clutch size, and nestling developmental time in driving the variation of  
98 sex roles in parental care. In general, we found species with female-only care are under strong sexual  
99 selection, and uncertain of parentage could reduce male care.

100

## 101 **Materials and methods**

### 102 *Sex roles classification*

103 We surveyed all passerine species in the Birds of the World database [36] for which sex provides parental  
104 care in each of the three forms — nest building, incubation, and offspring provisioning — across a  
105 reproductive cycle. The three forms were chosen because of the affluence of data and the relatively low  
106 phylogenetic correlations between them [3]. We took notes of the parental care features for each species  
107 from the breeding section of the species account, and then classified them into four categories for each  
108 form of care: (1) 'Male care', where only paternal care was present; (2) 'Female care', where only

109 maternal care was present; (3) ‘Biparental care’, where both parents provide care, and (4) ‘Cooperation’,  
110 where helpers of cooperatively breeding species also participate in caring of offspring (typically offspring  
111 provisioning). Since we are interested in the general patterns across different passerine species at an  
112 evolutionary scale, the within-species variations of sex roles were ignored. Therefore, cases where a form  
113 of care was provided usually by females alone but males were occasionally observed to participate were  
114 classified as ‘Female care’, and vice versa. In rare cases (34 species in nest building, 42 species in  
115 incubation, and 17 species in offspring provisioning), the parental care information was recorded with  
116 uncertain words, such as “reportedly” or “probably” in one or more care forms (e.g. White-throated Bulbul:  
117 nest reportedly built by both sexes; ... incubation possibly by both sexes, period 13 days; chicks fed by  
118 both parents). All statistical models were run by first including and then excluding those uncertain data.

119

120 In some species of cooperative breeding, the sex role categorization in each care form was straightforward  
121 (e.g. White Helmet-shrike: Cooperative breeder, all group-members assisting in all aspects of nesting  
122 duties. Breeding pair chooses nest-site and does most of the construction work, but assisted by other group  
123 members, ...; incubation by all group-members, ...; chicks brooded and fed by all of the group). In the  
124 others, the contribution of helpers to each care form may not be clearly specified. Given that cooperative  
125 breeding with helpers usually implies helpers’ participation in chick provisioning [37], we classified those  
126 species’ offspring provisioning as ‘Cooperation’, and classified the other two care forms according to  
127 additional details in the description regarding sex roles. For example, according to the description  
128 “Drakensberg Rockjumper: breeds as monogamous pair and co-operative, with helpers. Nest built by both  
129 sexes, ...; incubation by both sexes; no other information.”, we classified this species’ nest building and  
130 incubation as ‘Biparental care’, and offspring provisioning as ‘Cooperation’.

131

132 Following the above procedures, we collected 882 species with ‘full data’ (i.e. information about sex roles  
133 in all three care forms). We then matched the scientific names used in the data source [36] with the species  
134 names from a phylogenetic information source (BirdTree.org) [38] for further statistical analyses. Finally,  
135 we included in the statistical models 879 species of passerine birds where we have complete data on the  
136 phylogenetic information and contributor(s) of parental care in nest building, incubation, and offspring  
137 provisioning.

138

### 139 ***Explanatory variables in statistical models***

140 (a) Body size, which is the first principle component (PC1) of body mass and wing length (N = 749  
141 species), and (b) sexual selection, which is the PC1 of mating system and sexual dimorphism (N = 749  
142 species), were obtained following Dale et al. (2015) [32]. In short, the mating system was scored on a four-  
143 point scale, with ‘0’ representing strict social monogamy (e.g. zebra finch *Taeniopygia guttata*), ‘1’  
144 representing monogamy with infrequent instances of polygyny observed (< 5% of males, e.g. lazuli  
145 bunting *Passerina amoena*), ‘2’ representing mostly social monogamy with regular occurrences of  
146 facultative social polygyny (5 to 20% of males, e.g. American redstart *Setophaga ruticilla*), and ‘3’

147 representing obligate resource defense polygyny (> 20% of males, e.g. lance-tailed manakin *Chiroxiphia*  
148 *lanceolata*). Sexual dimorphism was quantified by the difference of plumage colors between males and  
149 females [32]. (c) EPP was the proportion of extra-pair offspring (N = 112 species) and (d) EPBr was the  
150 proportion of broods with extra-pair offspring (N = 111 species). Data on EPP and EPBr was obtained  
151 from the study of Brouwer & Griffith (2019) [39]. (e) Daily predation rate of nest (log10 transformed, N =  
152 225 species) was obtained from Matysioková & Remeš (2018) [40]. (f) Clutch size (log10 transformed, N  
153 = 733 species) and (g) length of the nestling developmental period (in days, log10 transformed, N = 591  
154 species) were collated from Cooney et al. (2020) [41]. (h) Research effort (N = 840 species), quantified as  
155 the number of independent entries per species in the Zoological Record database [42], was incorporated to  
156 account for data quality.

157

### 158 *Statistical analyses*

159 All analyses were carried out within R statistical environment [43]. Mainly, we used linear mixed-effect  
160 models from the package ‘*lme4*’ to investigate the variation of sex roles across three forms of parental care  
161 (nest building, incubation, and offspring provisioning), and tested the roles of the assumed driving forces  
162 of the variation [44]. Given the difference of premises regarding different hypotheses and the number of  
163 species available for relevant explanatory variables, we coded the response variables (i.e. the contributor(s)  
164 of parental care in each form) in two different ways, depending on the corresponding explanatory variables  
165 in a series of mixed-effects models.

166

167 The first way of recoding the contributor(s) of parental care focuses on the which sex provides the care.  
168 We recoded ‘Female care’, ‘Biparental care’ and ‘Male care’ as ‘-1’, ‘0’, and ‘+1’, respectively. Species in  
169 the ‘Cooperation’ category were also coded as ‘0’, because breeders and helpers of both sexes contributed  
170 to care. Using this way of recoding, we built four models to test whether sexual selection, extra-pair  
171 paternity, and nest predation were the main driving factors determining which sex provide care in each  
172 form. The second way of recoding the contributor(s) of parental care focuses on the number of individuals  
173 that provide care to a brood in each of the three forms. In this way, we recoded ‘Female care’ and ‘Male  
174 care’ as ‘1’, ‘Biparental care’ as ‘2’, and ‘Cooperation’ as ‘3’, because there were only one carer (either the  
175 male or the female) in the first category, two carers (both the male and female parent) in the second  
176 category, and at least three carers (both the male and female breeder and at least one helper) in the third  
177 category. The second way of recoding allowed us to build an additional model to test the association  
178 between offspring’s life history traits (reflecting offspring’s reproductive value and brood needs) and the  
179 number of carers in each care form. Detailed information about the five models were listed below.

180

181 **Model 1:** The model was built to quantify the association between sex roles in each of the three forms of  
182 parental care and sexual selection. In this model, sex roles of parental care (using the first way of recoding)  
183 was added as the response variable. We included ‘form of care’ (three levels: nest building, incubation, and  
184 offspring provisioning), ‘sexual selection’, ‘body size’, and ‘research effort’ as fixed effects. The ‘family’

185 of the species was included as a random effect to account for phylogenetic uncertainty.

186

187 **Model 2 and Model 3:** The two models were built to assess the association between sex roles in each of  
188 the three forms of parental care and the degrees of uncertainty in paternity. Sex roles of parental care  
189 (using the first way of recoding) was added as the response variable. We included ‘form of care’, ‘body  
190 size’, ‘research effort’, and either ‘EPP’ (in Model 2) or ‘EPBr’ (in Model 3) as fixed effects, and ‘family’  
191 of the species as a random effect.

192

193 **Model 4:** The model was built to test the association between sex roles in each of the three forms of  
194 parental care and daily nest predation rates. Sex roles of parental care (using the first way of recoding) was  
195 added as the response variable. We included ‘daily nest predation’, ‘form of care’, ‘body size’, and  
196 ‘research effort’ as fixed effects, and ‘family’ of the species as a random effect.

197

198 **Model 5:** The model was built to test the association between the number of carers in different care forms  
199 and offspring’s life history traits. In this model, sex roles of parental care (using the second way of  
200 recoding) was added as the response variable. We included ‘form of care’, ‘length of nestling  
201 developmental period’, ‘clutch size’, and ‘research effort’ as fixed effects. Like in the other models,  
202 ‘family’ of the species was treated as a random effect to account for phylogenetic uncertainty.

203

204

## 205 **Results**

### 206 *Large variation in sex roles across different forms of parental care*

207 We found substantial variation regarding which sex provides care across three different care forms in  
208 passerine birds (incubation *vs* nest building:  $t = -11.8$ ,  $p < 0.0001$ ; offspring provisioning *vs* nest  
209 building:  $t = 18.6$ ,  $p < 0.0001$ ; Figure 1; Table 1: Model 1). In general, ‘Female care’ and ‘Biparental  
210 care’ were the predominant categories across three care forms, while ‘Male care’ only presented in a small  
211 proportion (2.4%,  $N = 21$ ) of species in a single form of care (nest building). Specifically, during nest  
212 building, except for a small group of species with exclusive male investment, female and biparental care  
213 occurred almost equally frequently ( $N = 401$  species and  $N = 460$  species for female and biparental care,  
214 respectively; Figure 1). During incubation, ‘Female care’ was the most prevailing form ( $N = 585$  species;  
215 Figure 1), about twice the frequency of ‘Biparental care’ ( $N = 297$  species; Figure 1). During offspring  
216 provisioning, ‘Biparental care’ was the foremost category ( $N = 810$  species; Figure 1), with more than ten  
217 times the frequency of ‘Female care’ ( $N = 72$  species; Figure 1).

218

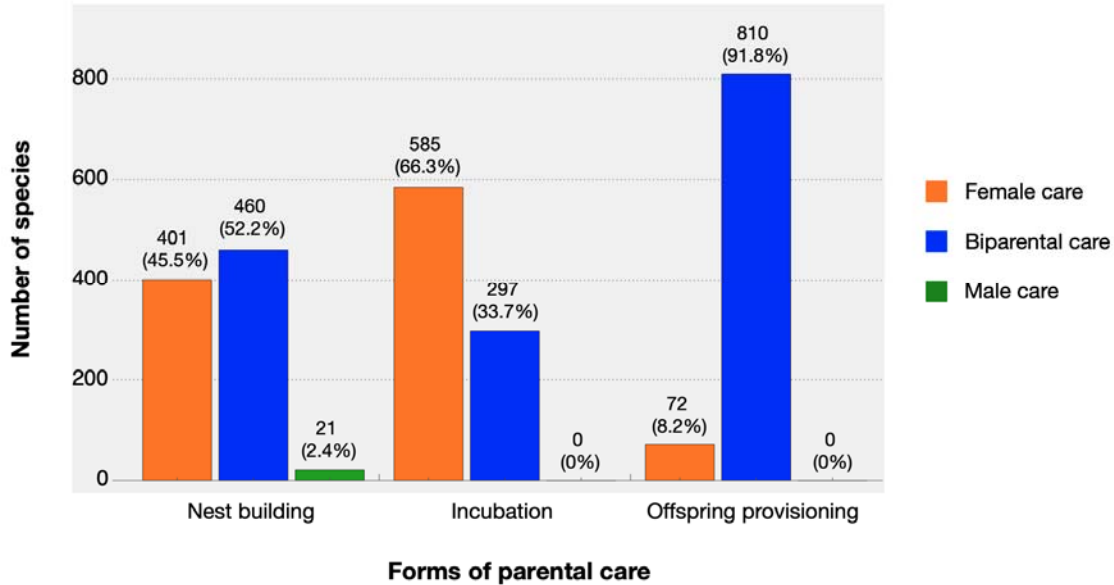

219

220 Figure 1. Variation of sex roles in different forms of parental care. The results were based on 882 species  
 221 with full data on sex roles ('Female care', 'Biparental care', and 'Male care') across three forms of  
 222 parental care: nest building, incubation, and offspring provisioning. Bars of different colors represent  
 223 different sex role categories. Note that a few species of cooperative breeding were grouped into the  
 224 'Biparental care' category (N = 34 species in nest building, N = 21 in incubation, and N=105 in offspring  
 225 provisioning).

226

227 Table 1. Summary of statistics of five linear mixed-effects models (Model 1 to Model 5). For the random  
 228 effect, the size of the variance components is shown. The estimate with its standard error (SE),  $t$ -value, and  
 229 corresponding  $p$  value is shown for each fixed effect.

|         |                        | Estimate              | $t$   | $P$    |
|---------|------------------------|-----------------------|-------|--------|
|         |                        | ( $\beta \pm SE$ )    |       |        |
| Model 1 | Random effects:        |                       |       |        |
|         | Family (n = 78)        | 0.047                 |       |        |
|         | Residual               | 0.144                 |       |        |
|         | Fixed effects:         |                       |       |        |
|         | Intercept              | -0.410 $\pm$ 0.030    | -13.4 | -      |
|         | Nest incubation        | -0.235 $\pm$ 0.020    | -11.8 | <0.001 |
|         | Offspring provisioning | 0.370 $\pm$ 0.020     | 18.6  | <0.001 |
|         | Sexual selection       | -0.067 $\pm$ 0.001    | -6.6  | <0.001 |
|         | Body size              | -0.045 $\pm$ 0.014    | -3.2  | 0.001  |
|         | Research effort        | 0.00004 $\pm$ 0.00003 | 1.1   | 0.29   |
| Model 2 | Random effects:        |                       |       |        |
|         | Family (n = 42)        | 0.046                 |       |        |
|         | Residual               | 0.143                 |       |        |

|         |                             |                     |       |        |
|---------|-----------------------------|---------------------|-------|--------|
|         | Fixed effects:              |                     |       |        |
|         | Intercept                   | -0.409 ± 0.060      | -6.8  | -      |
|         | Nest incubation             | -0.214 ± 0.051      | -4.2  | <0.001 |
|         | Offspring provisioning      | 0.491 ± 0.051       | 9.7   | 0.001  |
|         | EPP                         | 0.004 ± 0.002       | -2.3  | 0.02   |
|         | Research effort             | -0.000001 ± 0.00005 | -0.1  | 0.89   |
| Model 3 | Random effects:             |                     |       |        |
|         | Family (n = 42)             | 0.046               |       |        |
|         | Residual                    | 0.145               |       |        |
|         | Fixed effects:              |                     |       |        |
|         | Intercept                   | -0.397 ± 0.063      | -6.3  | -      |
|         | Nest incubation             | -0.225 ± 0.051      | -4.4  | <0.001 |
|         | Offspring provisioning      | 0.478 ± 0.051       | 9.3   | 0.001  |
|         | EPBr                        | -0.002 ± 0.001      | -1.9  | 0.05   |
|         | Research effort             | 0.000 ± 0.000       | 0.002 | 0.99   |
| Model 4 | Random effects:             |                     |       |        |
|         | Family (n = 55)             | 0.038               |       |        |
|         | Residual                    | 0.13                |       |        |
|         | Fixed effects:              |                     |       |        |
|         | Intercept                   | -0.503 ± 0.045      | -11.1 | -      |
|         | Nest incubation             | -0.233 ± 0.035      | -6.7  | <0.001 |
|         | Offspring provisioning      | 0.935 ± 0.035       | 15.4  | <0.001 |
|         | Body size                   | -0.019 ± 0.023      | -0.82 | 0.41   |
|         | Nest daily predation rate   | -0.123 ± 0.955      | -0.1  | 0.9    |
|         | Research effort             | 0.000 ± 0.000       | 0.2   | 0.87   |
| Model 5 | Random effects:             |                     |       |        |
|         | Family (n = 72)             | 0.089               |       |        |
|         | Residual                    | 0.193               |       |        |
|         | Fixed effects:              |                     |       |        |
|         | Intercept                   | 1.845 ± 0.399       | 4.6   | -      |
|         | Nest incubation             | -0.192 ± 0.029      | -6.7  | <0.001 |
|         | Offspring provisioning      | 0.563 ± 0.029       | 19.6  | <0.001 |
|         | Body size                   | 0.012 ± 0.023       | 0.5   | 0.62   |
|         | Nestling developmental time | -0.131 ± 0.254      | -0.5  | 0.61   |
|         | Clutch size                 | -0.095 ± 0.113      | -0.8  | 0.40   |
|         | Research effort             | -0.00003 ± 0.00004  | -0.6  | 0.53   |

230

231

232 ***Biases towards female care under strong sexual selection***

233 Overall, our statistical analysis of the linear mixed-effect model (Model 1) revealed a significant  
 234 association between sexual selection and the role of sexes in nest building, incubation, and offspring



235 provisioning ( , ; Table 1: Model 1; Figure 2). Despite the consistent pattern of sexual  
236 selection being markedly stronger in the ‘Female care’ than the ‘Biparental care’ category across all three  
237 forms of care, in the stage of nest building, sexual selection scores were the highest in the ‘Male care’  
238 category (N = 19 species). This pattern implies that in the small proportion of Passeriformes where nests  
239 were built solely by males, nest building may also function as a means of mate attraction. In addition, the  
240 model revealed that ‘Female care’ was more prevalent in species of larger body size ( , ;  
241 Table 1: Model 1). Furthermore, sex roles in parental care across three different care forms did not depend  
242 on research effort ( , ; Table 1: Model 1). The random effect ‘family’ explained 25% of  
243 variation in the response variable, indicating that sex roles in parental care have a phylogenetic signal  
244 (Table 1: Model 1).  
245

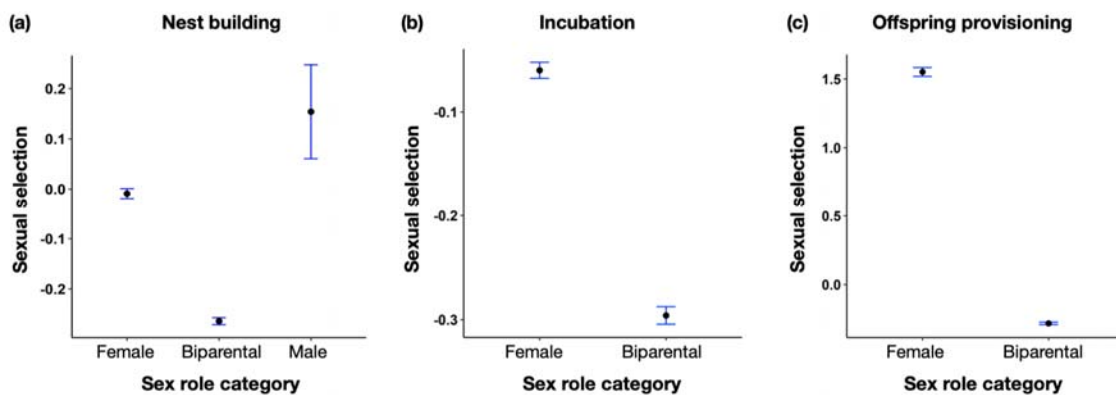

246  
247 Figure 2. Sexual selection (PC1 of mating system and sexual dimorphism) scores of three sex role  
248 categories in parental care across three distinct care forms. Plots in each panel showed the mean value with  
249 95% confidence intervals of sexual selection scores in each sex role category.

250

#### 251 *Association between certainty of paternity and male care*

252 Model 2 and Model 3 revealed consistently that male in species with high levels of EPP or EPBr tended to  
253 show less paternal care (i.e. more ‘Female care’ and ‘Biparental care’; EPP: , , EPBr:  
254 , ; Table 1: Model 2 and Model 3). Those patterns suggested that sexual selection on  
255 males and mixed paternity due to female multiple mating disfavour the evolution of male care.

256

#### 257 *No clear association between sex roles in parental care and predation risk*

258 Model 4 did not show a significant association between sex roles in parental care and nest daily predation  
259 rate across three different care forms ( , ; Table 1: Model 4). Hence, the difference  
260 between males and females in the cost of providing care (predation risk in this case) appeared to be non-  
261 essential in determining which sex provides care.

262

#### 263 *No clear association between the number of carers and offspring’s life history traits*

264 Model 5 showed no significant association between the number of carers in each care form and nestlings’

265 developmental time ( $t = -0.5, p = 0.61$ ; Table 1: Model 5). There was also no clear association between  
266 the number of carers and clutch size ( $t = -0.8, p = 0.40$ ; Table 1: Model 5). These results suggest that the  
267 reproductive value of the current brood (represented by clutch size) and brood needs (represented by both  
268 clutch size and nestling developmental time) were not determinant factors of the number of individuals  
269 that provide care.

270

## 271 **Discussion**

272 Our survey of more than 800 species of passerine birds revealed that sex roles of parental care differ  
273 substantially across different care forms (i.e. nest building, incubation, and offspring provisioning). In  
274 particular, we identified 21 species where nests were built solely by males, probably as a means of mate  
275 attraction. Analyses using a set of linear mixed-effects models identified several ecological and  
276 evolutionary factors that may explain sex differences across different forms of parental care. Uniparental  
277 care by females tended to be more frequent in species under strong sexual selection, and males were more  
278 likely to contribute in species with high certainty of paternity. However, we did not find a significant  
279 association between nest predation rate and sex-specific contribution to parental care. There was also no  
280 evidence that offspring's life history traits that reflect their reproductive value and brood needs played a  
281 role in the number of carers. Our major findings remain unchanged by excluding uncertain species from  
282 the dataset (Supplementary Table S1).

283

### 284 ***Parental care is not a unitary trait regarding which sex provides care***

285 The distribution of sex role categories differed greatly across the three forms of parental care we studied.  
286 During nest building, except a small proportion of species (2.4%, 21 species) where males contributed  
287 alone, biparental care and female-only care occurred at comparable frequencies (52.2% and 45.5%).  
288 During incubation, female-only care was the most prevalent form (66.3%) while male-only care was  
289 absent. In contrast, during offspring provisioning, biparental care was markedly predominant, with a  
290 proportion of 91.8% and male-only care was also absent. Our results during the offspring provisioning  
291 stage were in concordance with a previous survey of Cockburn (2006) [37], where he identified biparental  
292 care in 90% (9% with and 81% without helpers) of bird species that cover a broad phylogenetic spectrum.

293

294 However, we showed that biparental care was no longer the norm in other forms of parental care, and  
295 thereby we advocate that parental care should not be treated as a unitary trait, but a composite of several  
296 integrated features with diverse functions. For example, in species where males build nests alone and/or  
297 defend patches of resources, it is often unclear whether this behaviour should be regarded as a form of  
298 parental effort or mating effort [1]. Our finding of particularly strong sexual selection in the 21 species  
299 where males build nests alone supports a dual-purpose role of nest building as an investment in both mate  
300 attraction and offspring care. The model of Kelly & Alonzo (2009) [45] showed that males can evolve to  
301 allocate proportionally more of their resources to whichever trait (advertisement or parental care) that is  
302 more fitness limiting, and if offspring survival is strongly dependent on male care, male advertisement can

303 evolve to be a reliable indicator of parental care. Therefore, it would be interesting to further investigate  
304 whether female choice is based on males' different abilities in nest building, and whether offspring survival  
305 is strongly dependent on the quality of the nests in the 21 passerine species where nests are built by males  
306 only.

307

308 We found in this study that sex-specific contribution into parental care can differ greatly across different  
309 care forms. Our results and the lack of theoretical predictions highlighted important knowledge gaps in our  
310 understanding of parental care as a package with several functionally integrated traits, and how males and  
311 females were selected to fulfil different sex roles in the evolutionary time scale. Studies in birds have  
312 identified several factors that affect the (relative) contributions of the male and female parents in the  
313 ecological time scale, including the harshness of abiotic environments, especially temperature and rainfall  
314 [46–49], predation risk [50,51], the vulnerability of offspring in the absence of parental care [52,53], and  
315 the body condition of the parents themselves [54]. Studies also found that males and female can  
316 communicate and negotiate their parental effort [55–59], and the negotiation rules can be sex-specific [60].  
317 Would those factors also play a role in driving sex roles evolution in different care forms in the  
318 evolutionary time scale? Do they co-evolve with each other? And how eco-evolutionary feedbacks may  
319 affect the evolutionary trajectories and evolutionary transitions? Future work in both empirical and  
320 theoretical aspects are needed to answer those questions.

321

### 322 ***Strong sexual selection was tied to female-biased care***

323 Our analyses showed a consistent pattern of sexual selection being stronger in species of female-only care  
324 than in species of biparental care across three different forms of parental care. This result was in agreement  
325 with the Darwin-Bateman paradigm that predicts sexual selection on males leading to the evolution of  
326 conventional sex roles [61], and concurred with a recent survey of 659 bird species from 113 families,  
327 which found that parental cooperation decreased with the intensity of sexual selection and skewed adult  
328 sex ratios [27]. The study of [27] focused on the association between sexual selection and the “inequality”  
329 between males and females in parental care contributions, and therefore they recoded the parental care data  
330 without sex-specificity (i.e. uniparental care by the male or female were considered equally uncooperative  
331 and were both assigned a cooperation score of 0; biparental care biased towards either sex were assigned a  
332 cooperation score of 1; and only when males and females contributed approximately equally, the species  
333 were assigned a cooperation score of 2). In addition, although the parental care data of [27] contained eight  
334 different parental care activities (corresponding to different care forms in our study), the parental  
335 cooperation score was calculated by averaging the statistically centered extent of biparental care across the  
336 different activities. In comparison with [27], we covered a narrower phylogenetic spectrum (focusing on  
337 passerine birds), but included more species (882 species in total) and associated data on sex-specific  
338 contributions of parental care in three distinct forms. Our results were thus complementary to those of [27],  
339 and the combined results of these two studies suggest that the role of sexual selection on the evolution of  
340 sex-biased parental care may be widespread across avian taxa and across different forms of parental care.

341 Our findings also suggest that sexual selection may play a role in evolutionary transitions between major  
342 patterns of parental care, in agreement with previous studies in cichlid fishes [25] and shorebirds [26].

343

#### 344 ***Uncertainty of paternity selected against male care***

345 Our statistical model showed a significant association between extra-pair paternity and reduced male care  
346 across different parental care forms, in agreement with a number of previous comparative studies with a  
347 smaller number of species [62–65]. Although theory generally predicts that males should invest more in  
348 the care of their genetic offspring and adjust their parental efforts to their share of paternity in the nest [10–  
349 12,66], empirical support has been mixed, with abundant exceptions where males do not seem to react to  
350 the loss of paternity by reducing their parental care efforts. For example, male dunnocks (*Prunella*  
351 *modularis*) did not preferentially feed their genetic offspring in a mixed brood despite that males that had  
352 some paternity were more likely to feed the chicks in general [28,29]; male reed buntings (*Emberiza*  
353 *schoenichus*) did not adjust their parental effort in relation to EPP, and in mixed paternity nests they did not  
354 bias their provisioning to kin [30]; and males western bluebirds (*Sialia mexicana*) did not reduce parental  
355 care even when they observed their mate engaging in extra-pair copulations [31]. Recent theoretical  
356 studies revealed some conditions where males may evolve to be insensitive to the loss of paternity, e.g. in  
357 cooperative breeding species where offspring help to raise their younger (half-)siblings [67], or in the  
358 presence of male alternative reproductive tactics where the “sneaker” males specialize in gaining extra-pair  
359 paternity [68]. Empirical studies also found that in species where males were not sensitive to paternity loss,  
360 paternal care may not be costly in terms of parental survival [30] and/or the loss of opportunities for siring  
361 extra-pair offspring [23]. Few comparative studies (for a rare exception, see [69]) have tested the roles of  
362 potential factors that may explain the presence or absence of male response to paternity loss by reducing or  
363 withholding paternal care, probably due to a limitation of detailed data on life history traits related to  
364 parental care across species. Future efforts in generating and collating such data are therefore indispensable  
365 to a better understanding of the relation between certainty of paternity and male investment in parental care.

366

#### 367 ***Nest predation risk did not shape sex roles in parental care***

368 Our analyses did not show a significant association between nest predation risk and sex differences in  
369 parental care. This result was surprising since a survey of 256 species passerine birds showed that the  
370 frequency of nest visits decreased as the risk of nest predation increased, because frequent bouts of  
371 incubation could increase the visibility of a nest [40], and similar results were found also in seven species  
372 of arctic sandpipers [70]. Given that the plumage of females is usually drabber and more cryptic than  
373 males, we expected species with high nest predation to show more female-biased care. The lack of  
374 correlation could be due to either anti-predatory adaptations, confounding factors that masked the effect of  
375 female cryptic plumage, or a combination of both. Species that endure high nest predation risk may have  
376 evolved strategies that minimize activities that could attract predators, like long on- and off-bouts of  
377 incubation [46], and males with brighter plumage may evolve to attend the nest largely at night when  
378 visual predators were inactive, such as in the red-capped plover (*Charadrius ruficapillus*) [71].

379 Confounding factors such as nesting site quality and the shape of nests may also override the advantage of  
380 drabber plumage of females in providing care. For example, an study using 10 species of open-nesting  
381 birds in Arizona, USA revealed a positive correlation between nest predation and parental activity only  
382 when nest site effects were considered [72].

383

#### 384 *Brood needs and offspring's reproductive value did not affect the number of care providers*

385 Since broods of larger sizes and longer nestling developmental time generally have higher needs, we  
386 expected that more carers (i.e. both parents relative to a single parent, or breeders and helpers relative to  
387 only the breeders) were required to provide the elevated amount of care. But no such association was  
388 found in our data. Our results suggested that the amount of parental care a brood receives may not  
389 necessarily increase with the number of carers. Indeed, models have shown that a parent may or may not  
390 compensate for a reduction of parental effort by the other depending on various factors, including the  
391 marginal benefit/harm to offspring as a function of total care received, how well each parent is informed  
392 about brood needs, and how well the parents can monitor each other's investment [17,19,20,73].  
393 Negotiation between parents can even produce cases where the offspring do better with one parent than  
394 two [18]. Experimental studies by (temporally) removing a parent also showed that the compensation  
395 patterns can vary widely from a matching reduction, through no, partial, and full compensation, to even  
396 over-compensation [74–77]. Therefore, species are likely to have evolved redundancy in their abilities to  
397 provide care, and such abilities could be beneficial to secure reproductive success in cases of losing a  
398 partner and/or helper.

399

## 400 **Conclusion**

401 Through a survey of more than 800 species of passerine birds, we found significant variation in terms of  
402 which sex provides care in three different forms of parental care. Regarding nest building, except a small  
403 proportion of species (2.4%) where males build nests alone, the prevalence of female-only care and  
404 biparental care were nearly equal. As for incubation, female-only care was twice as frequent as biparental  
405 care. Regarding offspring provisioning, biparental care was the predominant pattern, with a prevalence of  
406 more than 90%. Our statistical models showed that the intensity of sexual selection may be the primary  
407 driving force of the sex-role variation we found in distinct parental care forms. We also found strong  
408 support for uncertainty of paternity selecting against male care. As a whole, our results suggest that  
409 parental care should not be treated as a unitary trait, but a composite of integrated features with diverse  
410 functions. For example, nest building by males may serve a dual function of mate attraction and parental  
411 care. Besides those findings, we also identified important knowledge gaps for future theoretical and  
412 empirical investigations. For example, we still lack testable theory that make predictions on the relative  
413 efforts of male and female parents in different care forms. And we still do not fully understand why males  
414 react to a loss of paternity by reducing paternal care in some species but not in others. Would the effects of  
415 sexual selection, certainty of paternity, predation risk and offspring life history traits we found in passerine  
416 birds be consistent with other avian species? Do other factors, such as adult sex ratio, operational sex ratio,

417 and sex-specific adult mortality, also play a role in shaping sex-role patterns in different forms of parental  
418 care? And how do these the driving factors interact with each other in eco-evolutionary feedbacks? Our  
419 current work provided a valuable starting point towards answering those new questions. And we encourage  
420 future empirical and theoretical studies to go beyond considering parental care as a unitary trait and delve  
421 deeper into the components of it, such as different forms and different stages across time.

422

423

## 424 **References**

- 425 1. Clutton-Brock TH. 1991 *The evolution of parental care*. Princeton University Press, Princeton.
- 426 2. Royle NJ, Smiseth PT, Kölliker M, editors. 2012 *The evolution of parental care*. Oxford University  
427 Press, Oxford.
- 428 3. Székely T, Remeš V, Freckleton RP, Liker A. 2013 Why care? Inferring the evolution of complex social  
429 behaviour. *J. Evol. Biol.* **26**, 1381–1391.
- 430 4. Trivers RL. 1972 Parental investment and sexual selection. In *Sexual Selection & the Descent of Man*,  
431 pp. 136–179. Aldine Publishing Company, Illinois, USA.
- 432 5. Maynard Smith J. 1977 Parental investment: A perspective analysis. *Anim. Behav.* **25**, 1–9.
- 433 6. Grafen A, Sibly R. 1978 A model of mate desertion. *Anim. Behav.* **26**, 645–652.
- 434 7. Gross MR, Sargent RC. 1985 The evolution of male and female parental care in fishes. *Am. Zool.* **25**,  
435 807–822.
- 436 8. Andersson M, Wiklund CG, Rundgren H. 1980 Parental defence of offspring: a model and an example.  
437 *Anim. Behav.* **28**, 536–542.
- 438 9. Winkler DW. 1987 A general model for parental care. *Am. Nat.* **130**, 526–543.
- 439 10. Whittingham LA, Taylor PD, Robertson RJ. 1992 Confidence of paternity and male parental care. *Am.*  
440 *Nat.* **139**, 1115–1125.
- 441 11. Westneat DF, Sherman PW. 1993 Parentage and the evolution of parental behavior. *Behav. Ecol.* **4**, 66–  
442 77.
- 443 12. Queller DC. 1997 Why do females care more than males? *Proc. R. Soc. B* **264**, 1555–1557.
- 444 13. Lehtonen J, Kokko H. 2012 Positive feedback and alternative stable states in inbreeding, cooperation,  
445 sex roles and other evolutionary processes. *Philos. Trans. R. Soc. B* **367**, 211–221.
- 446 14. Kokko H, Jennions MD. 2008 Parental investment, sexual selection and sex ratios. *J. Evol. Biol.* **21**,  
447 919–948.
- 448 15. Klug H, Bonsall MB, Alonzo SH. 2013 The origin of parental care in relation to male and female life  
449 history. *Ecol. Evol.* **3**, 779–791.
- 450 16. McNamara JM, Wolf M. 2015 Sexual conflict over parental care promotes the evolution of sex  
451 differences in care and the ability to care. *Proc. R. Soc. B* **282**, 20142752.
- 452 17. McNamara JM, Gasson CE, Houston AI. 1999 Incorporating rules for responding into evolutionary  
453 games. *Nature* **401**, 368–371.
- 454 18. McNamara JM, Houston AI, Barta Z, Osorno J-L. 2003 Should young ever be better off with one parent  
455 than with two? *Behav. Ecol.* **14**, 301–310.
- 456 19. Johnstone RA, Hinde CA. 2006 Negotiation over offspring care---how should parents respond to each

- 457 other's efforts? *Behav. Ecol.* **17**, 818–827.
- 458 20. Johnstone RA, Savage JL. 2019 Conditional cooperation and turn-taking in parental care. *Front. Ecol.*  
459 *Evol.* **7**, 335.
- 460 21. Barta Z, Székely T, Liker A, Harrison F. 2014 Social role specialization promotes cooperation between  
461 parents. *Am. Nat.* **183**, 747–761.
- 462 22. Henshaw JM, Fromhage L, Jones AG. 2019 Sex roles and the evolution of parental care specialization.  
463 *Proc. R. Soc. B* **286**, 20191312.
- 464 23. Safari I, Goymann W, Kokko H. 2019 Male-only care and cuckoldry in black coucals: does parenting  
465 hamper sex life? *Proc. R. Soc. B* **286**, 20182789.
- 466 24. Browning LE, Young CM, Savage JL, Russell DJF, Barclay H, Griffith SC, Russell AF. 2012 Carer  
467 provisioning rules in an obligate cooperative breeder: prey type, size and delivery rate. *Behav. Ecol.*  
468 *Sociobiol.* **66**, 1639–1649.
- 469 25. Gonzalez-Voyer A, Fitzpatrick JL, Kolm N. 2008 Sexual selection determines parental care patterns in  
470 cichlid fishes. *Evolution (N. Y.)* **62**, 2015–2026.
- 471 26. Olson VA, Webb TJ, Freckleton RP, Szekely T. 2009 Are parental care trade-offs in shorebirds driven by  
472 parental investment or sexual selection? *J. Evol. Biol.* **22**, 672–682.
- 473 27. Remeš V, Freckleton RP, Tökölyi J, Liker A, Székely T. 2015 The evolution of parental cooperation in  
474 birds. *Proc. Natl. Acad. Sci.* **112**, 13603–13608.
- 475 28. Burke T, Davies NB, Bruford MW, Hatchwell BJ. 1989 Parental care and mating behaviour of  
476 polyandrous dunnocks *Prunella modularis* related to paternity by DNA fingerprinting. *Nature* **338**, 249–  
477 251.
- 478 29. Davies NB, Hatchwell BJ, Robson T, Burke T. 1992 Paternity and parental effort in dunnocks *Prunella*  
479 *modularis*: how good are male chick-feeding rules? *Anim. Behav.* **43**, 729–745.
- 480 30. Bouwman KM, Lessells C (Kate) M, Komdeur J. 2005 Male reed buntings do not adjust parental effort  
481 in relation to extrapair paternity. *Behav. Ecol.* **16**, 499–506.
- 482 31. Dickinson JL. 2003 Male share of provisioning is not influenced by actual or apparent loss of paternity  
483 in western bluebirds. *Behav. Ecol.* **14**, 360–366.
- 484 32. Dale J, Dey CJ, Delhey K, Kempenaers B, Valcu M. 2015 The effects of life history and sexual selection  
485 on male and female plumage colouration. *Nature* **527**, 367–370.
- 486 33. Montgomerie RD, Weatherhead PJ. 1988 Risks and rewards of nest defence by parent birds. *Q. Rev. Biol.*  
487 **63**, 167–187.
- 488 34. Bowers EK, Jenkins JB, Mueller AJ, Miller KD, Thompson CF, Sakaluk SK. 2019 Condition-dependent  
489 begging elicits increased parental investment in a wild bird population. *Am. Nat.* **193**, 725–737.
- 490 35. Windt W, Curio E. 1986 Clutch defence in Great Tit (*Parus major*) pairs and the Concorde fallacy.  
491 *Ethology* **72**, 236–242.
- 492 36. Billerman SM, Keeney BK, Rodewald PG, Schulenberg TS, editors. 2020 *Birds of the World*. Cornell  
493 Laboratory of Ornithology, Ithaca, NY, USA. (doi:<https://birdsoftheworld.org/bow/home>)
- 494 37. Cockburn A. 2006 Prevalence of different modes of parental care in birds. *Proc. R. Soc. B* **273**, 1375–  
495 1383.
- 496 38. Jetz W, Thomas GH, Joy JB, Hartmann K, Mooers AO. 2012 The global diversity of birds in space and

- 497 time. *Nature* **491**, 444–448.
- 498 39. Brouwer L, Griffith SC. 2019 Extra-pair paternity in birds. *Mol. Ecol.* **28**, 4864–4882.
- 499 40. Matysioková B, Remeš V. 2018 Evolution of parental activity at the nest is shaped by the risk of nest  
500 predation and ambient temperature across bird species. *Evolution (N. Y.)*. **72**, 2214–2224.
- 501 41. Cooney CR *et al.* 2020 Ecology and allometry predict the evolution of avian developmental durations.  
502 *Nat. Commun.* **11**, 2383.
- 503 42. Valcu M, Dale J, Griesser M, Nakagawa S, Kempenaers B. 2014 Global gradients of avian longevity  
504 support the classic evolutionary theory of ageing. *Ecography (Cop.)*. **37**, 930–938.
- 505 43. R Core Team. 2021 *R: A language and Environment for Statistical Computing*. Vienna, Austria: R  
506 Foundation for Statistical Computing. See <https://www.r-project.org/>.
- 507 44. Bates D, Mächler M, Bolker B, Walker S. 2015 Fitting linear mixed-effects models using lme4. *J. Stat.*  
508 *Softw.* **67**, 1–48.
- 509 45. Kelly NB, Alonzo SH. 2009 Will male advertisement be a reliable indicator of paternal care, if offspring  
510 survival depends on male care? *Proc. R. Soc. B* **276**, 3175–3183.
- 511 46. Conway CJ, Martin TE. 2000 Evolution of passerine incubation behavior: influence of food,  
512 temperature, and nest predation. *Evolution (N. Y.)*. **54**, 670–685.
- 513 47. AlRashidi M, Kosztolányi A, Shobrak M, Küpper C, Székely T. 2011 Parental cooperation in an  
514 extreme hot environment: natural behaviour and experimental evidence. *Anim. Behav.* **82**, 235–243.
- 515 48. Coe BH, Beck ML, Chin SY, Jachowski CMB, Hopkins WA. 2015 Local variation in weather  
516 conditions influences incubation behavior and temperature in a passerine bird. *J. Avian Biol.* **46**, 385–  
517 394.
- 518 49. Vincze O *et al.* 2017 Parental cooperation in a changing climate: fluctuating environments predict shifts  
519 in care division. *Glob. Ecol. Biogeogr.* **26**, 347–358.
- 520 50. Basso A, Richner H. 2015 Effects of nest predation risk on female incubation behavior and offspring  
521 growth in great tits. *Behav. Ecol. Sociobiol.* **69**, 977–989.
- 522 51. Ghalambor CK, Martin TE. 2002 Comparative manipulation of predation risk in incubating birds  
523 reveals variability in the plasticity of responses. *Behav. Ecol.* **13**, 101–108.
- 524 52. Dale S, Gustavsen R, Slagsvold T. 1996 Risk taking during parental care: a test of three hypotheses  
525 applied to the pied flycatcher. *Behav. Ecol. Sociobiol.* **39**, 31–42.
- 526 53. Listøen C, Karlsen RF, Slagsvold T. 2000 Risk taking during parental care: a test of the harm-to-  
527 offspring hypothesis. *Behav. Ecol.* **11**, 40–43.
- 528 54. Komdeur J, Szentirmai I, Székely T, Bleeker M, Kingma SA. 2005 Body condition and clutch desertion  
529 in penduline tit *Remiz pendulinus*. *Behaviour* **142**, 1465–1478.
- 530 55. Sládeček M, Vozabulová E, Brynychová K, Šálek ME. 2019 Parental incubation exchange in a territorial  
531 bird species involves sex-specific signalling. *Front. Zool.* **16**, 7.
- 532 56. Bulla M, Valcu M, Rutten AL, Kempenaers B. 2019 Temporary mate removal during incubation leads to  
533 variable compensation in a biparental shorebird. *Front. Ecol. Evol.* **7**, 93.
- 534 57. Dey CJ, O'Connor CM, Balshine S, Quinn JS. 2014 Cooperative males reduce incubation in response to  
535 cues of female--female competition. *Ibis (Lond. 1859)*. **156**, 446–451.
- 536 58. Kosztolányi A, Cuthill IC, Székely T. 2009 Negotiation between parents over care: reversible



- 537            compensation during incubation. *Behav. Ecol.* **20**, 446–452.
- 538    59.    Hinde CA. 2006 Negotiation over offspring care?---a positive response to partner-provisioning rate in  
539            great tits. *Behav. Ecol.* **17**, 6–12.
- 540    60.    Iserbyt A, Farrell S, Eens M, Müller W. 2015 Sex-specific negotiation rules in a costly conflict over  
541            parental care. *Anim. Behav.* **100**, 52–58.
- 542    61.    Janicke T, Häderer IK, Lajeunesse MJ, Anthes N. 2016 Darwinian sex roles confirmed across the animal  
543            kingdom. *Sci. Adv.* **2**, e1500983.
- 544    62.    Møller AP, Birkhead TR. 1993 Certainty of paternity covaries with paternal care in birds. *Behav. Ecol.*  
545            *Sociobiol.* **33**, 261–268.
- 546    63.    Møller AP, Cuervo JJ. 2000 The evolution of paternity and paternal care in birds. *Behav. Ecol.* **11**, 472–  
547            485.
- 548    64.    Matysioková B, Remeš V. 2013 Faithful females receive more help: The extent of male parental care  
549            during incubation in relation to extra-pair paternity in songbirds. *J. Evol. Biol.* **26**, 155–162.
- 550    65.    Lifjeld JT *et al.* 2019 Evolution of female promiscuity in Passerides songbirds. *BMC Evol. Biol.* **19**, 1–  
551            14.
- 552    66.    Alonzo SH. 2010 Social and coevolutionary feedbacks between mating and parental investment. *Trends*  
553            *Ecol. Evol.* **25**, 99–108.
- 554    67.    Liedtke J, Fromhage L. 2012 When should cuckolded males care for extra-pair offspring? *Proc. R. Soc.*  
555            *B* **279**, 2877–2882.
- 556    68.    Li X-Y, Morozov A, Goymann W. 2021 Coevolution of female fidelity and male help in populations  
557            with alternative reproductive tactics. *Proc. R. Soc. B* **288**, 20202371.
- 558    69.    Griffin AS, Alonzo SH, Cornwallis CK. 2013 Why do cuckolded males provide paternal care? *PLoS*  
559            *Biol.* **11**, e1001520.
- 560    70.    Meyer N *et al.* 2020 Nest attentiveness drives nest predation in arctic sandpipers. *Oikos* **129**, 1481–1492.
- 561    71.    Ekanayake KB, Weston MA, Nimmo DG, Maguire GS, Endler JA, Küpper C. 2015 The bright incubate  
562            at night: sexual dichromatism and adaptive incubation division in an open-nesting shorebird. *Proc. R.*  
563            *Soc. B* **282**, 2015.
- 564    72.    Martin TE, Scott J, Menge C. 2000 Nest predation increases with parental activity: separating nest site  
565            and parental activity effects. *Proc. R. Soc. B* **267**, 2287–2293.
- 566    73.    Jones KM, Ruxton GD, Monaghan P. 2002 Model parents: is full compensation for reduced partner nest  
567            attendance compatible with stable biparental care? *Behav. Ecol.* **13**, 838–843.
- 568    74.    Rauter CM, Moore AJ. 2004 Time constraints and trade-offs among parental care behaviours: effects of  
569            brood size, sex and loss of mate. *Anim. Behav.* **68**, 695–702.
- 570    75.    Smiseth PT, Dawson C, Varley E, Moore AJ. 2005 How do caring parents respond to mate loss?  
571            Differential response by males and females. *Anim. Behav.* **69**, 551–559.
- 572    76.    Suzuki S, Nagano M. 2009 To compensate or not? Caring parents respond differentially to mate removal  
573            and mate handicapping in the burying beetle, *Nicrophorus quadripunctatus*. *Ethology* **115**, 1–6.
- 574    77.    Harrison F, Barta Z, Cuthill I, Szekely T. 2009 How is sexual conflict over parental care resolved? A  
575            meta-analysis. *J. Evol. Biol.* **22**, 1800–1812.
- 576
